# Supplementary material for: Duplicated Copy Number Variant of the Maize 9-Lipoxygenase ZmLOX5 Improves 9,10-KODA-Mediated Resistance to Fall Armyworms
Source: MDPI journal article supplement (doi:10.3390/genes15040401), 2024-03-25
Supplement: s1 [file s1]

Table S1. Primer sequences of the genes for ddPCR, genotyping and sequencing used in this study

| Primer name                          | Primer sequence (5'-3')   |
|--------------------------------------|---------------------------|
| <b>ddPCR primers</b>                 |                           |
| <i>ZmLOX5gsp-L</i>                   | CTCCATATGAGCCTGGGCAGATTG  |
| <i>ZmLOX5gsp-R</i>                   | CAAGCGTGGACTCCTCTCTC      |
| <i>α-Tubulin-F</i>                   | GCTATCCTGTGATCTGCCCTG     |
| <i>α-Tubulin-R</i>                   | CGCCAAACTTAATAACCCAGTA    |
| <b>Genotyping primers</b>            |                           |
| 9242                                 | AGAGAAGCCAACGCCAWCGCCTCYA |
| <i>lox5-3F</i>                       | TGCCGGACCAGTCAAGCCCATAT   |
| <i>lox5-3R</i>                       | GGCCCCCTCCGGTTCTTCAAGTC   |
| <b>Sequencing primers</b>            |                           |
| <i>ZmLOX5gDL-L</i>                   | GCGGTGATCGAGCCGTTTCGTAATC |
| <i>ZmLOX5gDL-R</i>                   | CAAGCGTGGACTCCTCTCTC      |
| <b>B73 ZmLOX5 specific primers</b>   |                           |
| <i>B73-8<sup>th</sup> intron-F</i>   | ACTGAGGTGAGCAGCACTAAAC    |
| <i>B73-8<sup>th</sup> intron-R</i>   | GTTTAGTGCTGCTCACCTCAG     |
| <b>Yu796 ZmLOX5 specific primers</b> |                           |
| <i>Yu796-8<sup>th</sup> intron-F</i> | TAGACAATACATAGATCGACTACAC |
| <i>Yu796-8<sup>th</sup> intron-R</i> | TATAGGCACCTCAGTACGTGTA    |

Table S2. Primer sequences for qRT-PCR tests in this study

| Primer name          | Primer (5'-3')         | Tm (°C) | Product size (bp) |
|----------------------|------------------------|---------|-------------------|
| <i>ZmLOX5-F</i>      | GGGCAGATTGTGTCTCGTAGTA | 62      | 140               |
| <i>ZmLOX5-R</i>      | ATATTCAAGCGTGGACTCCTCT | 60      | 140               |
| <i>ZmLOX8-F</i>      | CAGTACCGACAGACAGCCAT   | 60      | 163               |
| <i>ZmLOX8-R</i>      | GTTTCGGACCACCAAATCAA   | 57      | 163               |
| <i>ZmLOX10-F</i>     | ATCCTCAGCATGCATTAGTCC  | 59      | 139               |
| <i>ZmLOX10-R</i>     | AGTCTCAAACGTGCCTCTTGT  | 59      | 139               |
| <i>ZmJAR1a-F</i>     | TCTATCCGCCAAGCTGTTTC   | 58      | 150               |
| <i>ZmJAR1a-R</i>     | CCCCGTCATAATGCCATAGATG | 61      | 150               |
| <i>Zmα-Tubulin-F</i> | GCTATCCTGTGATCTGCCCTG  | 62      | 139               |
| <i>Zmα-Tubulin-R</i> | CGCCAAACTTAATAACCCAGTA | 59      | 139               |

Table S3. Sequencing results of *LOX5-CNV1* and *LOX5-CNV2* showing several SNPs found in Exons 9 and 10 relative to the reference sequence of *ZmLOX5* (Zm00001eb216870) of B73-REFERENCE-NAM-5.0 genome )

| gDNA position at B73 | B73                        | Yu796-CNV1                 | Percentage (%) | Yu796-CNV2                 | Percentage (%) | AA position at B73 | B73 | Yu796-CNV1 | Yu796-CNV2 |
|----------------------|----------------------------|----------------------------|----------------|----------------------------|----------------|--------------------|-----|------------|------------|
| 3810                 | <u>A</u> A <u>G</u>        | <u>A</u> A <u>G</u>        | 61.5           | <u>G</u> <u>T</u> <u>G</u> | 38.5           | 391                | K   | K          | <u>V</u>   |
| 3963                 | <u>A</u> A <u>C</u>        | <u>A</u> A <u>C</u>        | 69.2           | <u>G</u> A <u>C</u>        | 30.8           | 442                | N   | N          | <u>D</u>   |
| 3984                 | <u>G</u> A <u>T</u>        | <u>G</u> A <u>T</u>        | 69.2           | <u>T</u> A <u>T</u>        | 30.8           | 449                | D   | D          | <u>Y</u>   |
| 4216                 | A <u>T</u> <u>C</u>        | A <u>T</u> <u>C</u>        | 38.5           | A <u>T</u> <u>A</u>        | 61.5           | 496                | I   | I          | I          |
| 4323                 | <u>C</u> <u>C</u> <u>C</u> | <u>C</u> <u>C</u> <u>C</u> | 46.2           | <u>C</u> <u>G</u> <u>C</u> | 53.8           | 532                | P   | P          | <u>R</u>   |
| 4326                 | A <u>G</u> <u>G</u>        | A <u>G</u> <u>G</u>        | 46.2           | A <u>T</u> <u>G</u>        | 53.8           | 533                | R   | R          | <u>M</u>   |
| 4354                 | A <u>G</u> <u>G</u>        | A <u>G</u> <u>G</u>        | 61.5           | A <u>G</u> <u>C</u>        | 38.5           | 542                | R   | R          | <u>S</u>   |
| 4365                 | A <u>C</u> <u>C</u>        | A <u>C</u> <u>C</u>        | 69.2           | A <u>G</u> <u>C</u>        | 30.8           | 546                | T   | T          | <u>S</u>   |
| 4404                 | A <u>A</u> <u>C</u>        | A <u>A</u> <u>C</u>        | 69.2           | A <u>T</u> <u>C</u>        | 30.8           | 559                | N   | N          | <u>I</u>   |
| 4410                 | <u>G</u> <u>G</u> <u>G</u> | <u>G</u> <u>G</u> <u>G</u> | 30.8           | <u>G</u> A <u>G</u>        | 69.2           | 561                | G   | G          | <u>E</u>   |
| 4596                 | T <u>C</u> <u>C</u>        | T <u>C</u> <u>C</u>        | 69.2           | <u>T</u> <u>T</u> <u>C</u> | 30.8           | 623                | S   | S          | <u>F</u>   |

The Table presents the SNPs found in the coding sequence of Yu796 -2×*LOX5* compared to the B73-*LOX5* locus and the respective changes on the amino acid (AA) sequences. % represents the frequency of specific SNP occurrence in the sequenced PCR amplification products (n=13).
